# Supplementary material for: Characterization and microRNA Expression Analysis of Serum-Derived Extracellular Vesicles in Severe Liver Injury from Chronic HBV Infection
Source: MDPI journal article supplement (doi:10.3390/life13020347), 2023-01-28

## SUPPLEMENTAL MATERIAL

**SUPPLEMENTAL TABLE S1.** Candidate miRNAs for validation set.

| Gene ID             | log2 (FoldChange) | Qvalue    | Regulation |
|---------------------|-------------------|-----------|------------|
| hsa-miR-122-3p      | 4.83              | 4.93E-210 | Up         |
| hsa-miR-4433a-3p    | 3.62              | 9.90E-60  | Up         |
| hsa-miR-877-5p      | 2.95              | 1.10E-06  | Up         |
| hsa-miR-1468-5p     | 2.6               | 4.17E-74  | Up         |
| hsa-miR-29a-3p      | -3.13             | 1.95E-168 | Down       |
| hsa-miR-29c-3p      | -3.62             | 1.93E-105 | Down       |
| novel-hsa-miR172-5p | -4.14             | 1.49E-68  | Down       |
| hsa-miR-411-5p      | -4.18             | 1.10E-121 | Down       |
| hsa-miR-379-5p      | -4.87             | 5.62E-151 | Down       |
| hsa-miR-1-3p        | -6.62             | 0.00E+00  | Down       |
| hsa-miR-133a-3p     | -7.4              | 0.00E+00  | Down       |
| hsa-miR-335-5p      | -8.14             | 3.09E-08  | Down       |
| hsa-miR-204-3p      | -8.64             | 3.43E-11  | Down       |
| hsa-miR-1285-5p     | -8.75             | 7.70E-13  | Down       |
| hsa-miR-206         | -10.01            | 0.00E+00  | Down       |

**SUPPLEMENTAL TABLE S2.** Primers in the present study involved.

| miRNAs               | RT Primer(5'-3')                                   | Forward Primer(5'-3') |
|----------------------|----------------------------------------------------|-----------------------|
| cel-miR-39-3p        | GTCGTATCCAGTGCAGGGTCCGAGGTATTCGCACTGGATACGACCAAGCT | GCGTCACCGGGTGTAAATC   |
| novel-hsa-miR-172-5p | GTCGTATCCAGTGCAGGGTCCGAGGTATTCGCACTGGATACGACCGCCAC | CGCGAGGCTGGAGTGCA     |
| hsa-miR-122-3p       | GTCGTATCCAGTGCAGGGTCCGAGGTATTCGCACTGGATACGACTATTTA | CGCGAACGCCATTATCACAC  |
| hsa-miR-1468-5p      | GTCGTATCCAGTGCAGGGTCCGAGGTATTCGCACTGGATACGACCAGCGA | GCGCTCCGTTTGCCTGTT    |
| hsa-miR-1-3p         | GTCGTATCCAGTGCAGGGTCCGAGGTATTCGCACTGGATACGACATACAT | GCGCGTGGAATGTAAAGAAGT |
| hsa-miR-411-5p       | GTCGTATCCAGTGCAGGGTCCGAGGTATTCGCACTGGATACGACCGTACG | CGCGCGTAGTAGACCGTATAG |
| hsa-miR-29c-3p       | GTCGTATCCAGTGCAGGGTCCGAGGTATTCGCACTGGATACGACTAACCG | CGCGTAGCACCATTGTGAAT  |
| hsa-miR-133a-3p      | GTCGTATCCAGTGCAGGGTCCGAGGTATTCGCACTGGATACGACCAGCTG | GCGTTTGGTCCCCTTCAAC   |
| hsa-miR-29a-3p       | GTCGTATCCAGTGCAGGGTCCGAGGTATTCGCACTGGATACGACTAACCG | CGCGTAGCACCATCTGAAAT  |
| hsa-miR-204-3p       | GTCGTATCCAGTGCAGGGTCCGAGGTATTCGCACTGGATACGACCAGCTG | GCGTTTGGTCCCCTTCAAC   |
| hsa-miR-206          | GTCGTATCCAGTGCAGGGTCCGAGGTATTCGCACTGGATACGACCCACAC | GCGCGTGGAATGTAAGGAAGT |
| hsa-miR-1285-5p      | GTCGTATCCAGTGCAGGGTCCGAGGTATTCGCACTGGATACGACCCTGGG | GCGCGGATCTCACTTTGTTG  |
| hsa-miR-335-5p       | GTCGTATCCAGTGCAGGGTCCGAGGTATTCGCACTGGATACGACACATTT | CGCGTCAAGAGCAATAACGAA |
| hsa-miR-877-5p       | GTCGTATCCAGTGCAGGGTCCGAGGTATTCGCACTGGATACGACCCCTGC | CGCGGTAGAGGAGATGGC    |
| hsa-miR-379-5p       | GTCGTATCCAGTGCAGGGTCCGAGGTATTCGCACTGGATACGACCCTACG | GCGCGTGGTAGACTATGGAA  |
| hsa-miR-4433a-3p     | GTCGTATCCAGTGCAGGGTCCGAGGTATTCGCACTGGATACGACATGTCC | GCGACAGGAGTGGGGGTG    |

**SUPPLEMENTAL TABLE S3.** Sensitivity and Specificity of clinical indicators in discriminating between different groups.

| Group        | Target                   | Sensitivity% | Specificity% |
|--------------|--------------------------|--------------|--------------|
| NC vs. CHB   | novel-has-miR-172-5p     | 84.85        | 72.73        |
|              | has-miR-1285-5p          | 79.17        | 71.43        |
|              | miRNA panel <sup>1</sup> | 83.33        | 76.19        |
| NC vs. DeCi  | novel-has-miR-172-5p     | 69.70        | 75.76        |
|              | has-miR-1285-5p          | 58.33        | 95.24        |
|              | has-miR-335-5p           | 85.29        | 58.06        |
|              | miRNA panel <sup>2</sup> | 83.33        | 80.95        |
| CHB vs. DeCi | has-miR-335-5p           | 88.24        | 41.18        |
|              | CHE                      | 86.49        | 86.84        |
|              | AST/ALT                  | 82.69        | 87.72        |
|              | Ca <sup>2+</sup>         | 89.83        | 77.36        |
|              | panel <sup>3</sup>       | -            | -            |
|              | panel <sup>4</sup>       | 91.67        | 91.30        |

miRNA panel<sup>1</sup> is the combination of miR-172-5p and miR-1285-5p;

miRNA panel<sup>2</sup> is the combination of miR-172-5p, miR-1285-5p, and miR-335-5p;

panel<sup>3</sup> is the combination of AST/ALT, Ca<sup>2+</sup>, and CHE;

panel<sup>4</sup> is the combination of AST/ALT, Ca<sup>2+</sup>, CHE, and miR-335-5p.

**SUPPLEMENTAL FIGURE S1.** Representative electron micrograph of serum EVs. Scale bar=100 nm.

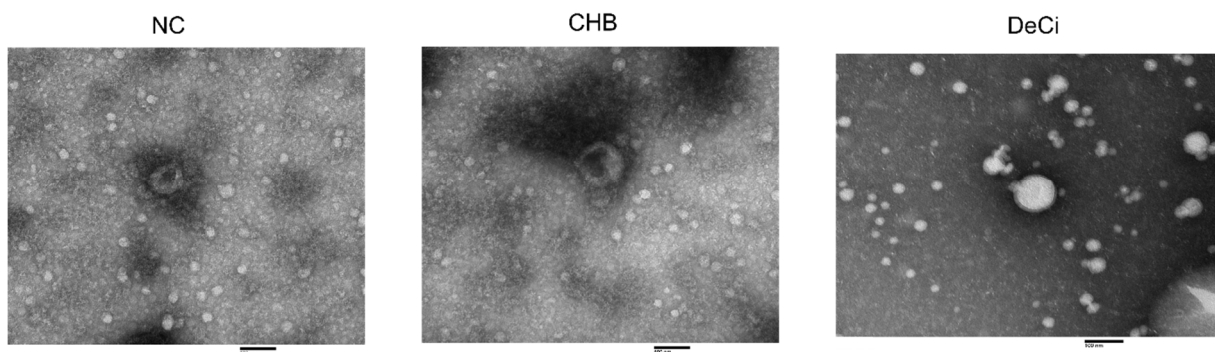

**SUPPLEMENTAL FIGURE S2.** Regression lines and correlation coefficients between number of EVs per/mL at the NTA. **(A)** Quantification of nanoparticles using NTA. **(B)** Diameter of EVs in nm using NTA. In **A** and **B**, the horizontal line indicates the median and box, and bars represent the 25–75th and the 5–95th percentiles, respectively. ns, not significant.

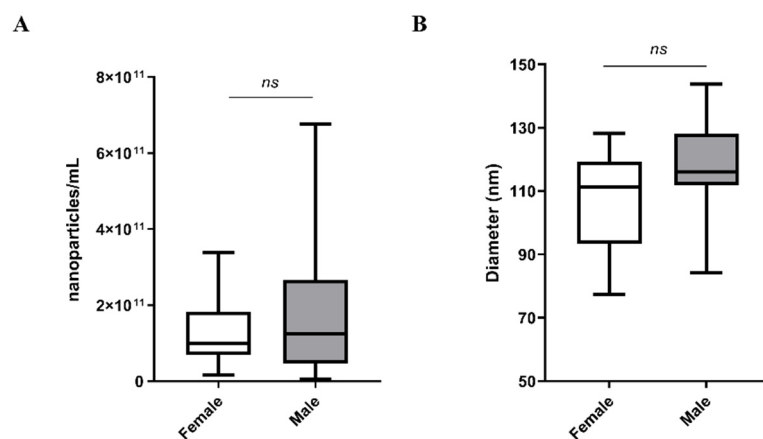

**SUPPLEMENTAL FIGURE S3.** Verification of serum EV miRNA expression levels evaluated by qRT-PCR. (A–C) The expression profile of serum EV hsa-miR-411-5p (A), hsa-miR-877-5p (B), and hsa-miR-4433-5p (C) in NC, CHB, and DeCi patients. Each P value was calculated with a nonparametric Mann–Whitney test: ns, not significant.

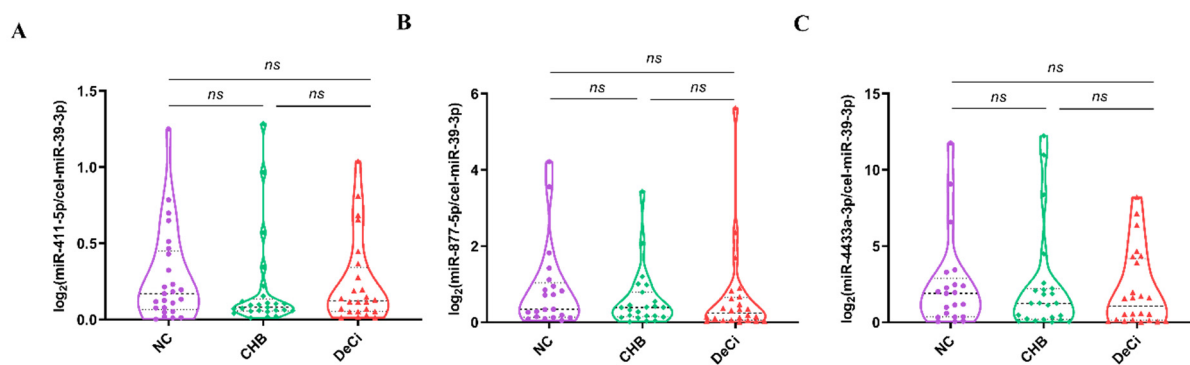

Supplement: s1 [file s1]
