# Supplementary figures and images for: Characterization and microRNA Expression Analysis of Serum-Derived Extracellular Vesicles in Severe Liver Injury from Chronic HBV Infection
Source: MDPI journal article supplement (doi:10.3390/life13020347), 2023-01-28

NC

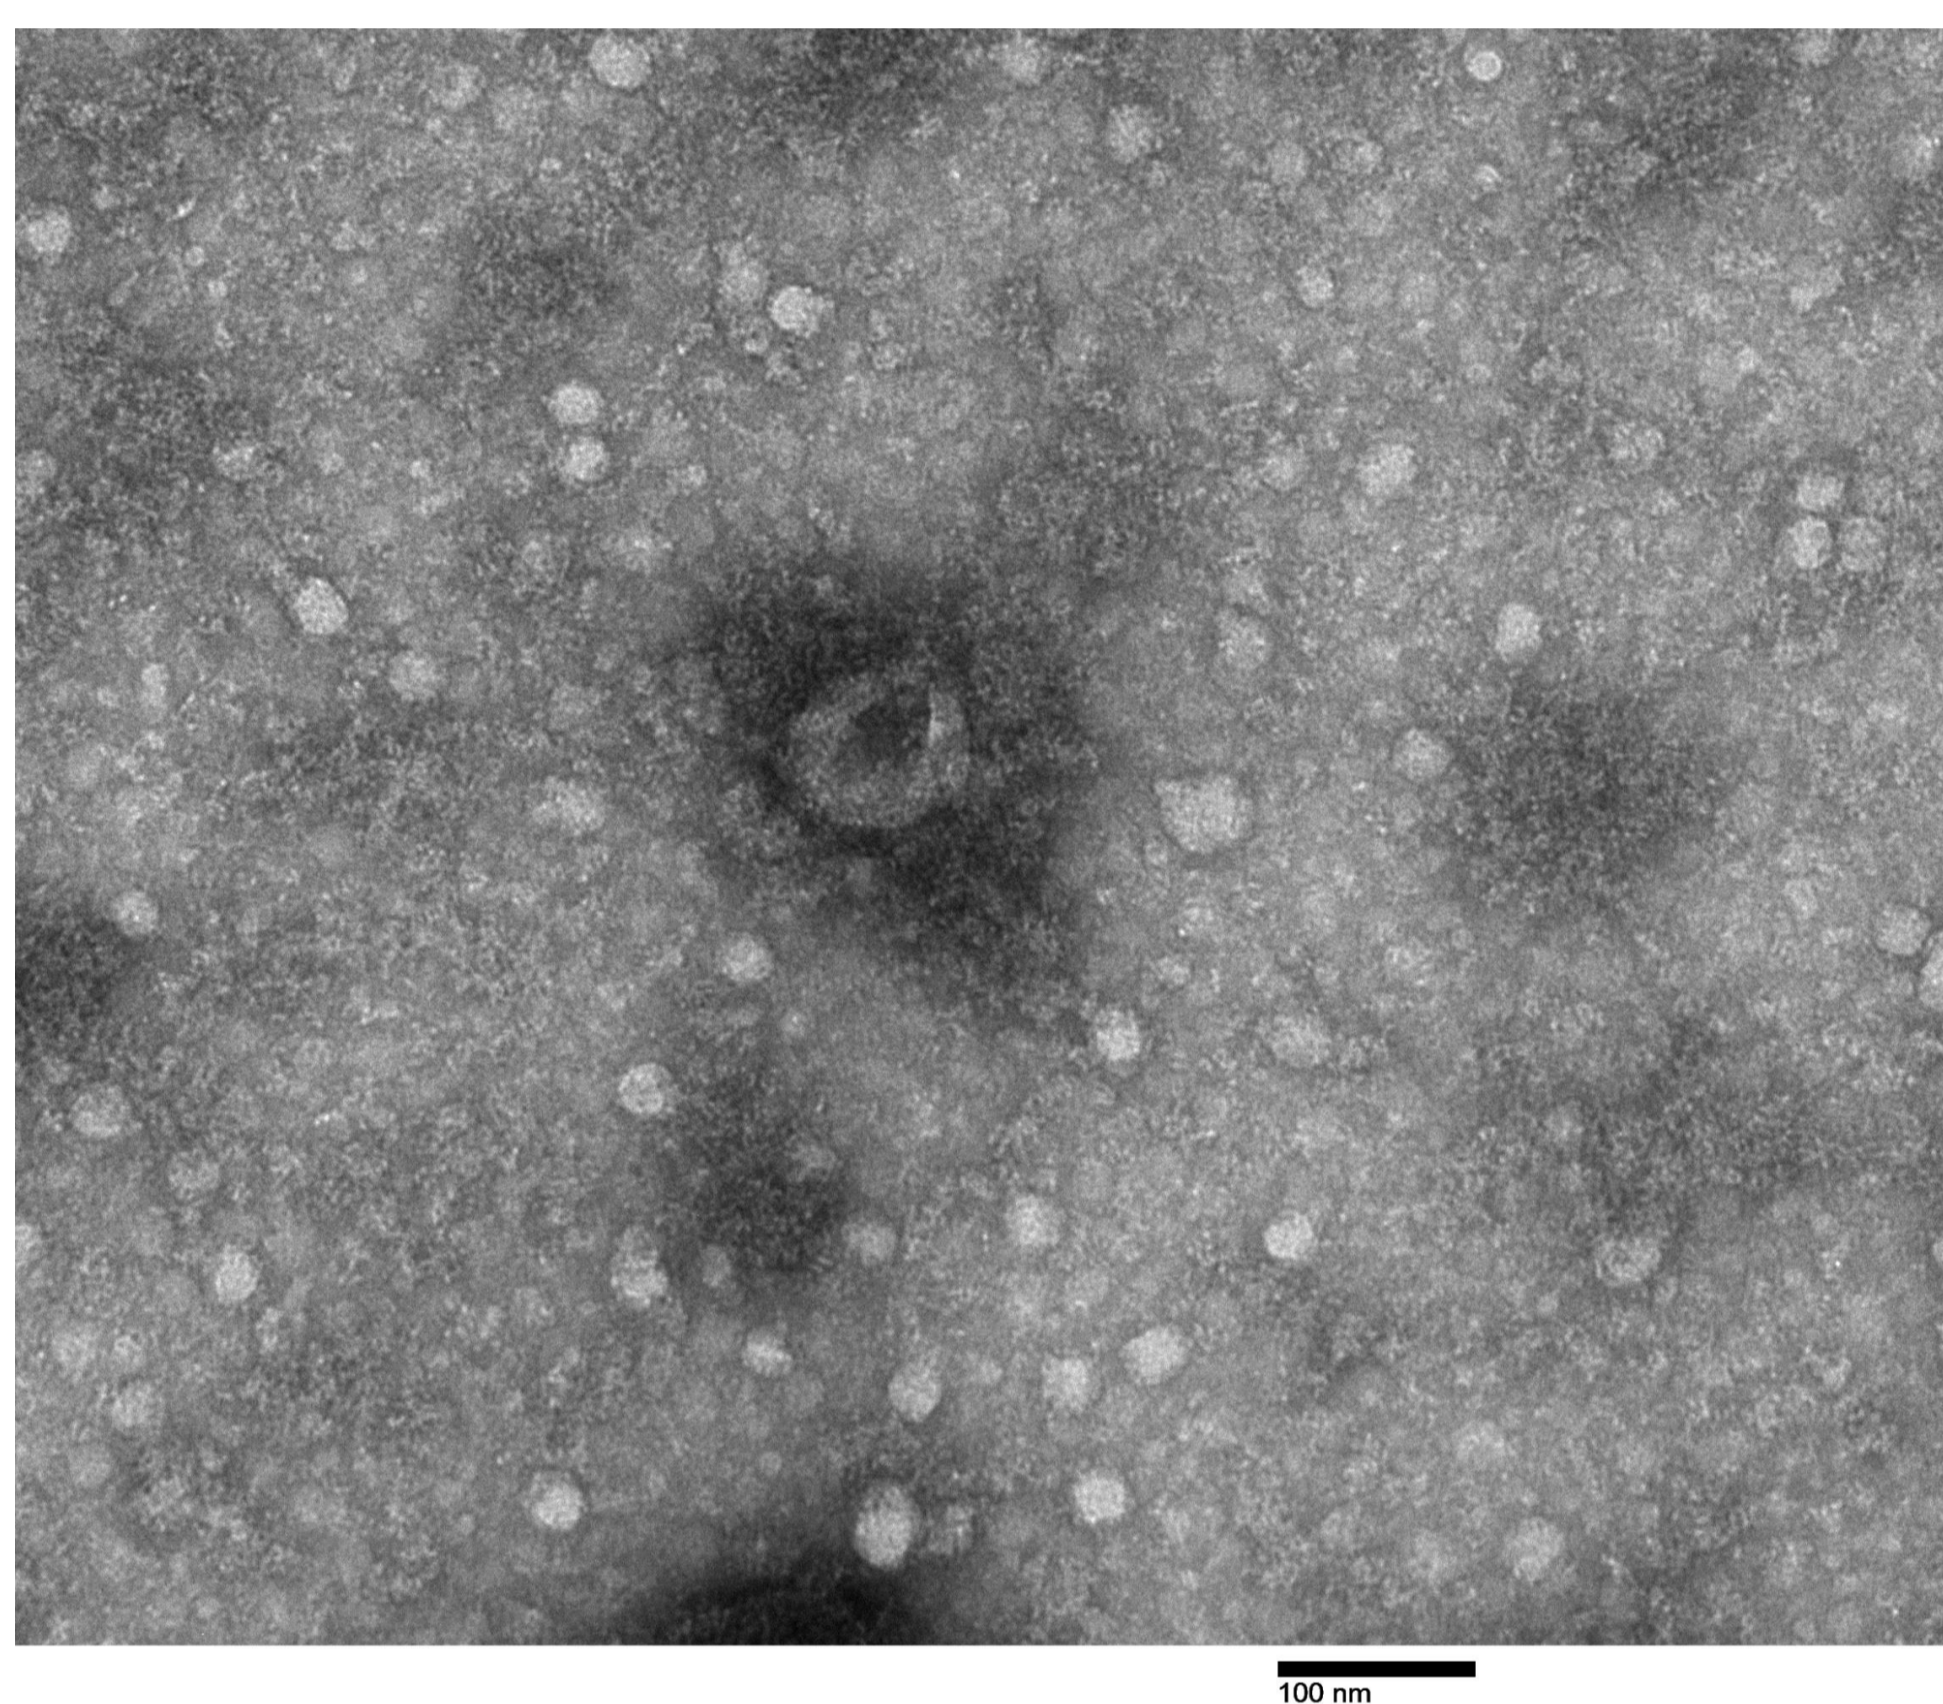

CHB

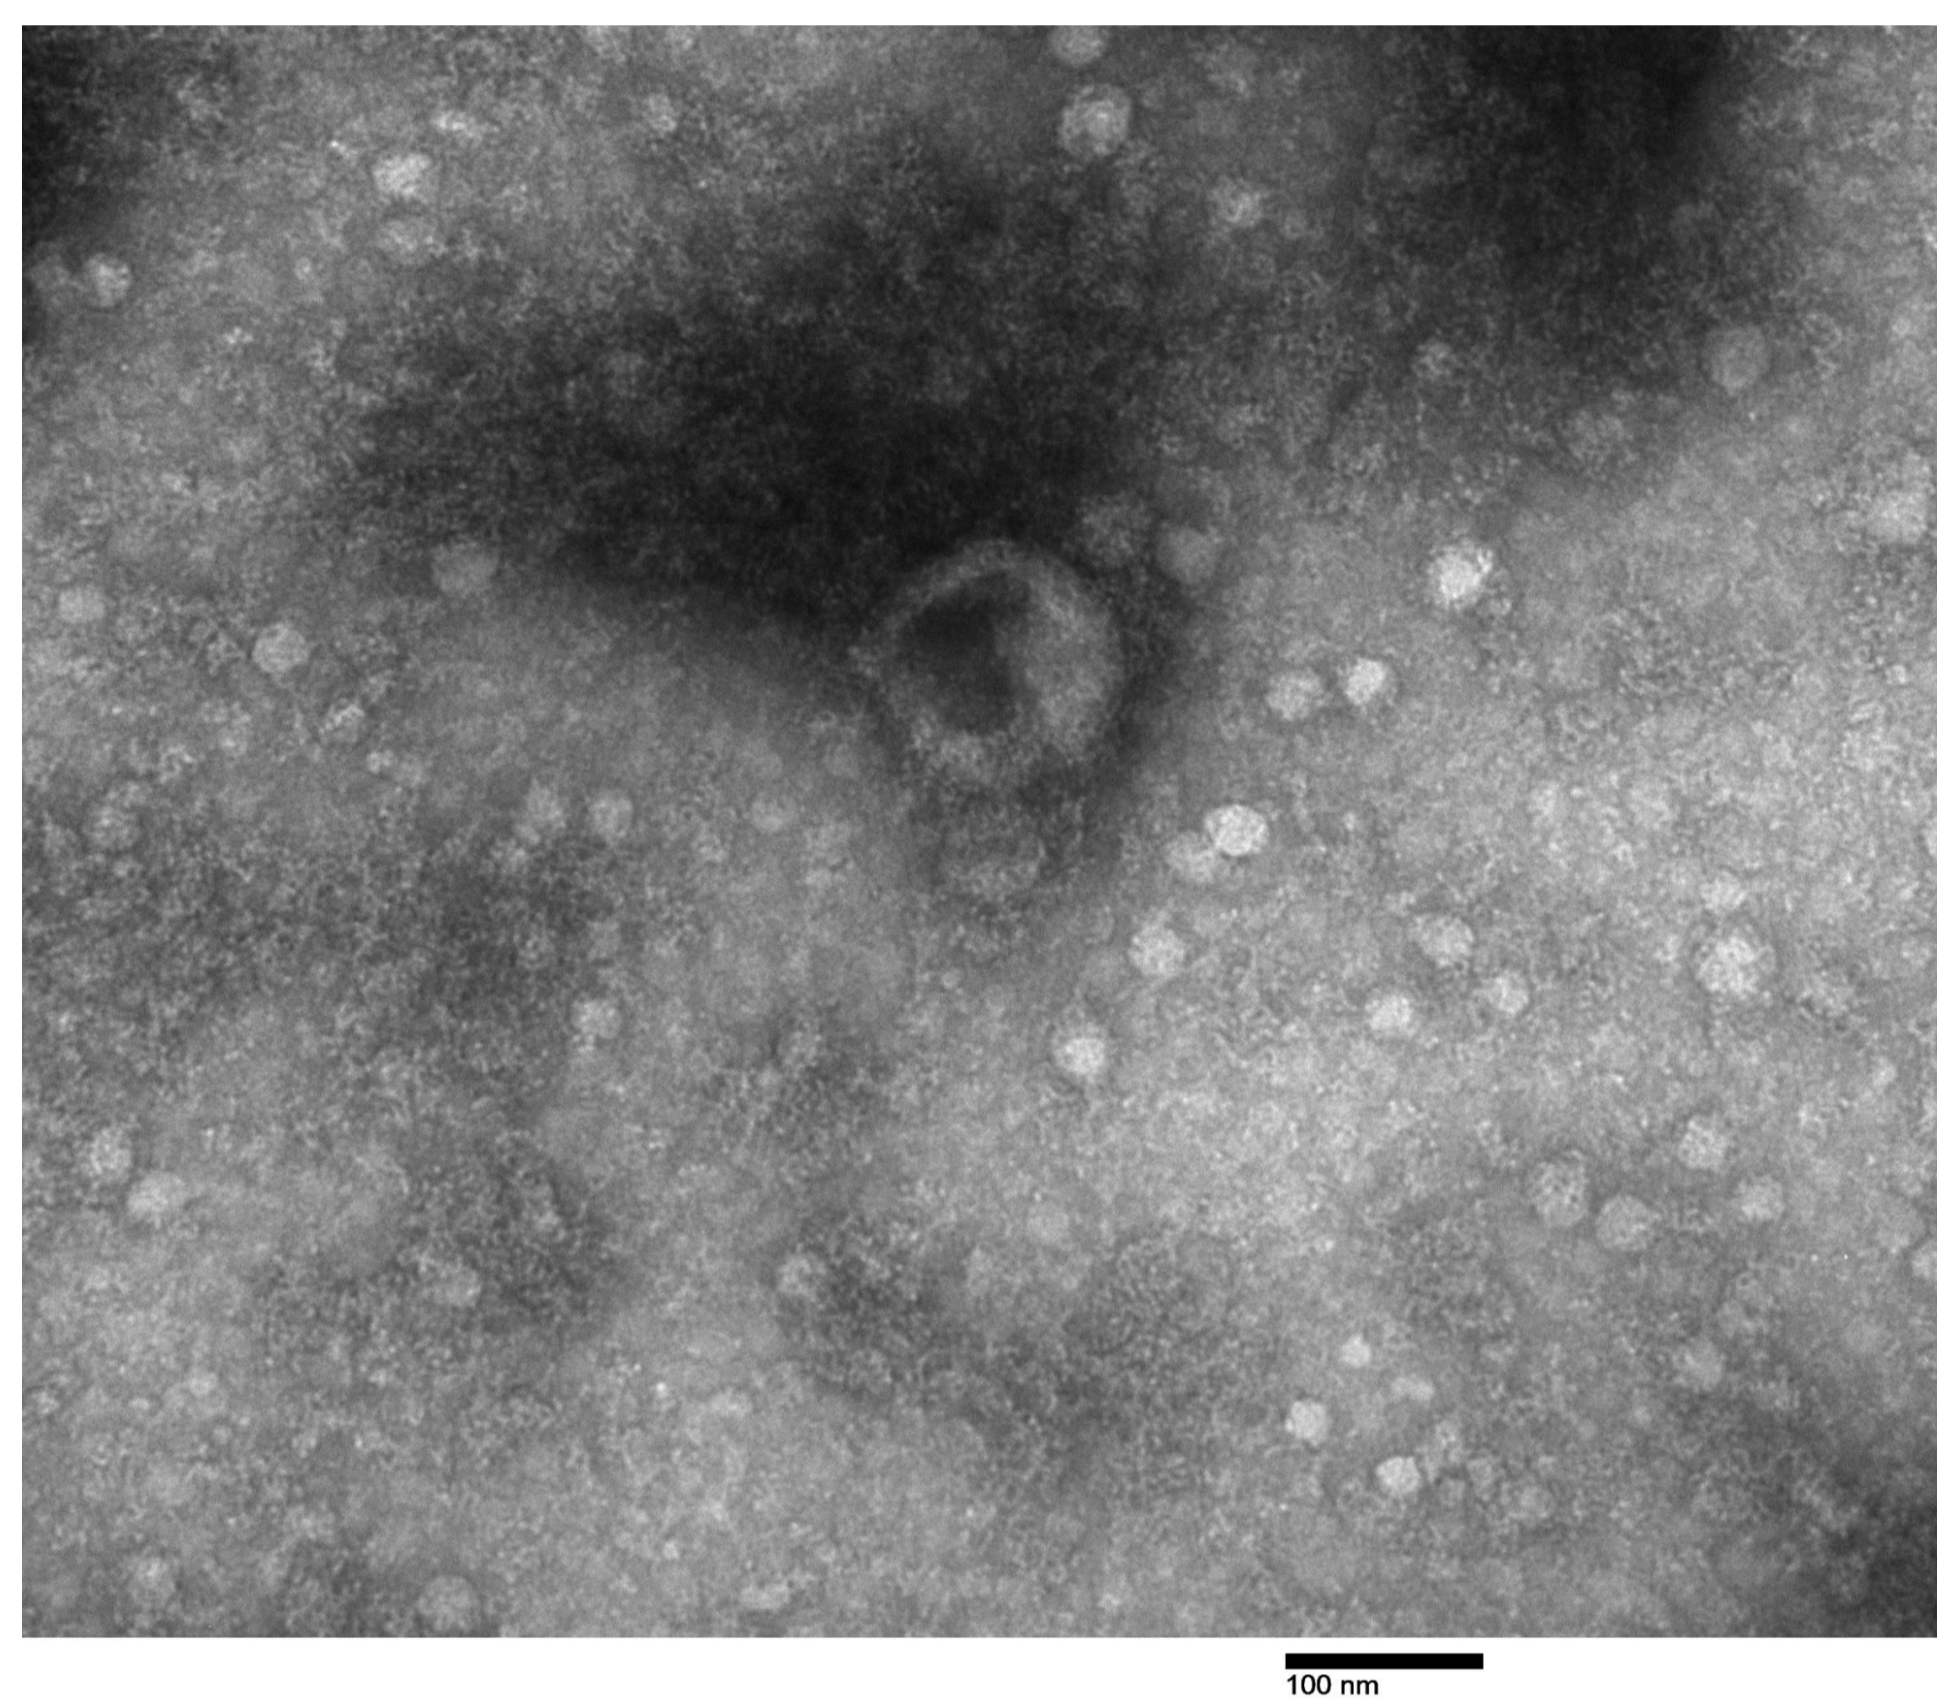

DeCi

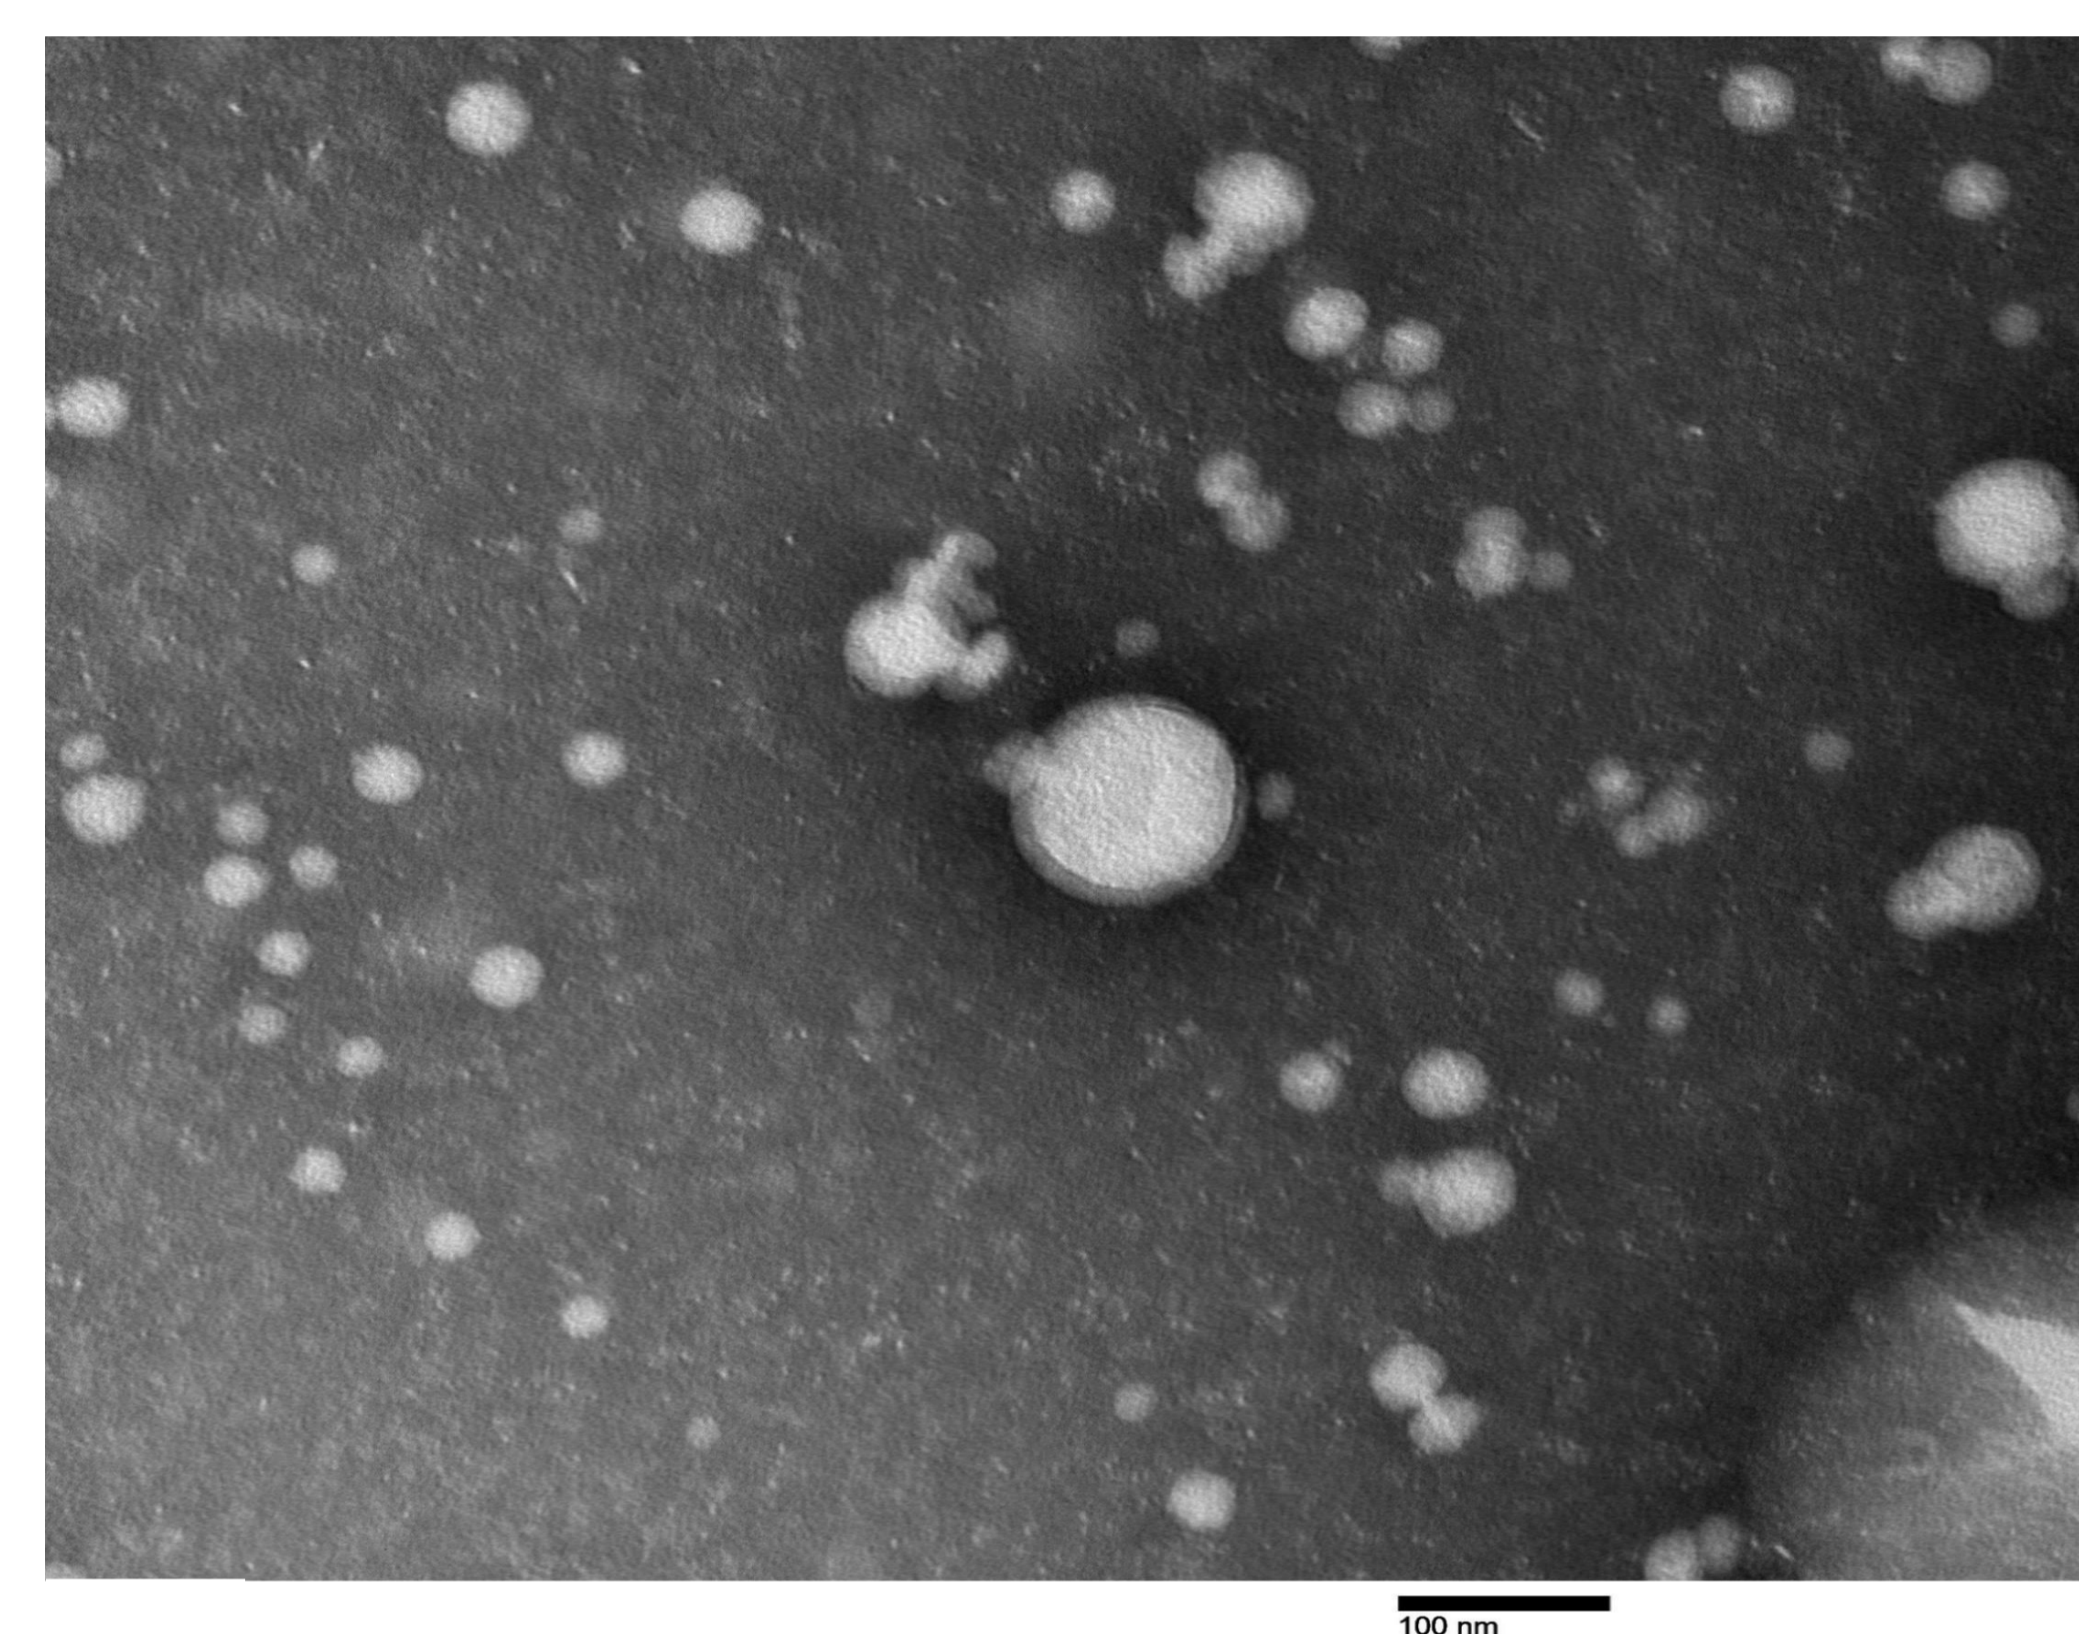

Supplement: s1 [file s1]
